# Supplementary material
Source: Research Square preprint supplement (doi:10.21203/rs.3.rs-10335743/v1)
Supplement: Supplementary file 1 [file 5c09589327b0a6cab3ff21d6.docx]

**Appendix**

**Appendix A. Two-level HLM results supporting quantile regression interpretation**

The quantile regression results in this manuscript are interpreted alongside a two-level hierarchical linear model estimated on the same analytical sample (n=4,653 students, 190 schools). The HLM was estimated using maximum likelihood in Stata 17 using the mixed command, with results averaged across all ten plausible mathematics values using Rubin’s (1987) combination rules. The null HLM yielded an intraclass correlation coefficient of 0.181, confirming that 18.1 % of total mathematics score variance lies between schools. Table A1 demonstrates the full two-level HLM results.

**Table A1. Two-level HLM results**

| **Variable** | **Coefficient** | **p-value** | **Note** |
| --- | --- | --- | --- |
| **Level 1 — Student-level** |  |  |  |
| ESCS | 3.87 | < 0.001 | Halved from OLS (8.36) — school composition effect |
| GENDER (male = 1) | 9.12 | < 0.001 | Male advantage in mathematics |
| MATHEFF | 7.37 | < 0.001 | Strongest student-level predictor |
| TEACHSUP | 4.63 | < 0.001 | Teacher support — significant and positive |
| BELONG | 6.30 | < 0.001 | School belonging — significant and positive |
| DISCLIM | 1.70 | 0.09 | Disciplinary climate — marginally significant |
| **Level 2 — School-level** |  |  |  |
| UNQUALSTAFF | −10.17 | < 0.05 | Significant across all 10 PVs |
| STAFFSHORT | +6.98 | > 0.10 | Non-significant after controls |
| CERTTEACH | −0.09 | > 0.10 | Non-significant after controls |
| RURAL | +12.08 | < 0.01 | Compositional — see note below |
| STRATIO | +0.09 | > 0.10 | Non-significant after controls |
| **Variance components** |  |  |  |
| Between-school variance (τ²) | 584.05 | — | ↓27.9% from null model (810.44) |
| Within-school variance (σ²) | 3,369.98 | — | ↓8.2% from null model |
| Conditional ICC | 0.147 | — | 14.7% residual between-school variance |

Note: Estimated using ML in Stata 17 mixed command. Coefficients across PV1MATHC- PV10 MATH using Rubin (1987) rules. UNQUALSTAFF coefficient range across plausible values: −8.48 to −11.23, negative in all ten, significant at p < 0.05 in eight. RURAL coefficient range: +10.37 to +13.60. The positive RURAL coefficient reflects compositional differences between urban and rural schools, urban schools serve a more socioeconomically disadvantaged student population (mean ESCS_school = −0.854) than rural schools (mean ESCS_school = −0.375). When school-level mean ESCS is added as a Level 2 control, the RURAL coefficient collapses to −0.19 and becomes entirely non-significant, confirming the compositional rather than institutional nature of the apparent rural advantage. STAFFSHORT is non-significant in the HLM after full controls — its positive quantile regression coefficients (particularly at Q90) are discussed in the main text. LR test vs. linear model: p < 0.0001 across all ten PVs.

Source: Author's calculations using PISA 2022 Uzbekistan data in Stata 17.
